# Supplementary material for: Alkane degradation under anoxic conditions by a nitrate-reducing bacterium with possible involvement of the electron acceptor in substrate activation
Source: PubMed Central journal article supplement (PMC3151549; doi:10.1111/j.1758-2229.2010.00198.x), 2011-02
Supplement: emi40003-0125-SD2.pdf [file emi40003-0125-SD2.pdf]

**Table S1.** General genome<sup>a</sup> features of strain HdN1.

---

|                                             |               |
|---------------------------------------------|---------------|
| Size (bp)                                   | 4,587,455     |
| G + C content (mol%)                        | 53.26         |
| Stable RNAs                                 |               |
| rRNAs                                       | 9 (3 operons) |
| tRNAs                                       | 47            |
| Protein-coding sequences (CDS) <sup>b</sup> | 3,763         |
| Coding (%)                                  | 89.2          |
| Average length (bp)                         | 1,088         |
| Pseudo genes                                | 45            |

---

<sup>a</sup> Accession no. FP929140

<sup>b</sup> Without "pseudo"-qualifier
