# Supplementary material for: Alkane degradation under anoxic conditions by a nitrate-reducing bacterium with possible involvement of the electron acceptor in substrate activation
Source: PubMed Central journal article supplement (PMC3151549; doi:10.1111/j.1758-2229.2010.00198.x), 2011-02
Supplement: emi40003-0125-SD3.pdf [file emi40003-0125-SD3.pdf]

**Zedelius et al.****Table S2.** Genome-based TBLASTN-search for genes (*bssA* and homologues) that may encode fumarate-dependent glycy radical enzymes for anaerobic alkane activation.

| Query        |          |             |                                                                                                          | Best TBLASTN-hit in genome of strain HdN1 |         |              |              |
|--------------|----------|-------------|----------------------------------------------------------------------------------------------------------|-------------------------------------------|---------|--------------|--------------|
| Gene name    | Acc. no. | Amino acids | Predicted function, organism                                                                             | Position                                  | E-value | Identities   | Positives    |
| <i>bssA</i>  | CAI07159 | 861         | $\alpha$ -Subunit, benzylsuccinate synthase, denitrifying Betaproteobacterium strain EbN1                | 762,138 – 761,950                         | 1.2     | 20/70 (29%)  | 30/70 (43%)  |
| <i>masD</i>  | CAO03074 | 839         | $\alpha$ -Subunit, (1-methylalkyl)succinate synthase, denitrifying Betaproteobacterium strain HxN1       | 1,510,228 – 1,510,115                     | 0.3     | 16/38 (42%)  | 24/38 (63%)  |
| <i>nmsA</i>  | CAO72219 | 828         | $\alpha$ -Subunit, (2-naphthylmethyl)succinate synthase, sulfate-reducing Deltaproteobact. strain NaphS2 | 1,591,168 – 1,591,049                     | 1.1     | 15/40 (38%)  | 20/40 (50%)  |
| <i>dhaB1</i> | CAJ67970 | 790         | Glycerol dehydratase, <i>Clostridium difficile</i> 630                                                   | 235,877 – 235,695                         | 4.1     | 22/73 (30%)  | 31/73 (42%)  |
| <i>pflB</i>  | P09373   | 760         | Pyruvate formate lyase, <i>Escherichia coli</i> K12                                                      | 2,685,988 – 2,686,473                     | 0.27    | 41/170 (24%) | 74/170 (44%) |
| <i>nrdD</i>  | P28903   | 712         | Anaerobic ribonucleotide reductase, <i>Escherichia coli</i> K12                                          | 1,500,318 – 1,500,040                     | 2.1     | 25/95 (26%)  | 41/95 (43%)  |

TBLASTN was performed as described by Altschul, S.F., Madden, T.L., Schaffer, A.A., Zhang, J., Zhang, Z., Miller, W., and Lipman, D.J. (1997) Gapped BLAST and PSI-BLAST: a new generation of protein database search programs. *Nucleic Acids Res* **25**: 3389–3402.
