# Supplementary material for: Alkane degradation under anoxic conditions by a nitrate-reducing bacterium with possible involvement of the electron acceptor in substrate activation
Source: PubMed Central journal article supplement (PMC3151549; doi:10.1111/j.1758-2229.2010.00198.x), 2011-02
Supplement: emi40003-0125-SD5.pdf [file emi40003-0125-SD5.pdf]

**Zedelius et al.**

**Table S4.** Genome-based prediction of alkane monooxygenases (alkane hydroxylases) in strain HdN1.

| Predicted gene (product) of strain HdN1                                       |            |             |                                        |                       | BLASTP hit used for annotation |                       |         |             |
|-------------------------------------------------------------------------------|------------|-------------|----------------------------------------|-----------------------|--------------------------------|-----------------------|---------|-------------|
| Identifier                                                                    | Start (bp) | Amino acids | Predicted function                     | InterPro <sup>a</sup> | Gene                           | Organism <sup>b</sup> | E-value | Acc. no.    |
| <b><i>Cyt P450 monooxygenase</i> (accessory proteins<sup>c</sup> in grey)</b> |            |             |                                        |                       |                                |                       |         |             |
| HDN1F_17550                                                                   | 2,213,848  | 106         | Ferredoxin                             | IPR001041             |                                | Alcbo                 | 2e-44   | Q5ca10      |
| HDN1F_17560                                                                   | 2,214,183  | 471         | Cytochrom P450 alkane hydroxylase      | IPR001128             | <i>ahpG2</i>                   | Alcbo                 | 0       | Q5K133      |
| HDN1F_17570                                                                   | 2,215,803  | 410         | Ferredoxin reductase                   | IPR001327             |                                | Alcbo                 | 0       | Q5ca08      |
| <b><i>Alkane-1-monooxygenase</i> (di-iron enzyme)</b>                         |            |             |                                        |                       |                                |                       |         |             |
| HDN1F_04180                                                                   | 517,699    | 314         | Transcriptional regulator, AlkR        | IPR000005             | <i>alkR</i>                    | Acica                 | 4e-71   | Q9xdp8      |
| HDN1F_04190                                                                   | 517,997    | 423         | Alkane 1-monooxygenase, AlkM (di-iron) | IPR012145             |                                | Aciba                 | 1e-138  | ZP_05827357 |
| <b><i>Alkane-1-monooxygenase</i> (flavin enzyme)</b>                          |            |             |                                        |                       |                                |                       |         |             |
| HDN1F_14540                                                                   | 1,814,074  | 505         | Alkane 1-monooxygenase (flavin)        | IPR000960             |                                | Alcbo                 | 9e-167  | YP_692002   |
| HDN1F_17470                                                                   | 2,204,606  | 500         | Alkane 1-monooxygenase (flavin)        | IPR000960             |                                | Alcbo                 | 0       | YP_692002   |
| HDN1F_17580                                                                   | 2,218,527  | 512         | Alkane 1-monooxygenase (flavin)        | IPR000960             |                                | Alcbo                 | 0       | YP_691914   |
| HDN1F_30030                                                                   | 3,708,484  | 495         | Alkane 1-monooxygenase (flavin)        | IPR000960             |                                | Alcbo                 | 2e-178  | YP_692002   |
| HDN1F_36680                                                                   | 4,423,219  | 511         | Alkane 1-monooxygenase (flavin)        | IPR000960             |                                | Alcbo                 | 3e-159  | YP_691914   |

<sup>a</sup> IPR001041: domain, ferredoxin; IPR001128: family, cytochrome P450; IPR001327: domain, FAD-dependent pyridine nucleotide-disulfide oxidoreductase; IPR000005: domain, helix-turn-helix, AraC type; IPR012145: family, alkane 1-monooxygenase; IPR000960: family, flavin-containing monooxygenase FMO.

<sup>b</sup> Abbreviations for organisms: Aciba, *Acinetobacter baumannii*; Acica, *Acinetobacter calcoaceticus*; Alcbo, *Alcanivorax borkumensis*.

<sup>c</sup> Genes for accessory proteins in direct proximity to the predicted oxygenase-related genes.
