# Supplementary material for: Alkane degradation under anoxic conditions by a nitrate-reducing bacterium with possible involvement of the electron acceptor in substrate activation
Source: PubMed Central journal article supplement (PMC3151549; doi:10.1111/j.1758-2229.2010.00198.x), 2011-02
Supplement: emi40003-0125-SD6.pdf [file emi40003-0125-SD6.pdf]

Zedelius *et al.*

**Table S5.** Genome-based prediction of *cbb*<sub>3</sub>-type oxidases (oxidases with high O<sub>2</sub>-affinity) in strain HdN1.

| Predicted gene (product) of strain HdN1 |             |            |             |                                                                        |                                             | BLASTP hit used for annotation |                       |         |          |
|-----------------------------------------|-------------|------------|-------------|------------------------------------------------------------------------|---------------------------------------------|--------------------------------|-----------------------|---------|----------|
| Gene name                               | Identifier  | Start (bp) | Amino acids | Predicted function                                                     | InterPro <sup>a</sup><br>COG <sup>b,c</sup> | Gene                           | Organism <sup>d</sup> | E-value | Acc. no. |
| <i>ccoP</i>                             | HDN1F_11960 | 1,483,054  | 298         | Cytochrome <i>c</i> oxidase <i>cbb</i> <sub>3</sub> -type, subunit III | IPR004678<br>COG2010                        | <i>ccoP</i>                    | Azose                 | 1e-65   | Q5P0X3   |
| <i>ccoQ</i>                             | HDN1F_11970 | 1,483,947  | 76          | Probable cytochrome <i>c</i> oxidase, subunit CcoQ                     | IPR008621<br>COG4736                        | <i>ccoQ</i>                    | Azose                 | 1e-04   | Q5P0X4   |
| <i>ccoO</i>                             | HDN1F_11980 | 1,484,180  | 207         | Cytochrome <i>c</i> oxidase, <i>cbb</i> <sub>3</sub> -type, subunit II | IPR003468<br>COG2993                        | -                              | -                     | -       | -        |
| <i>ccoN</i>                             | HDN1F_11990 | 1,484,818  | 480         | Cytochrome <i>c</i> oxidase, <i>cbb</i> <sub>3</sub> -type, subunit I  | IPR004677<br>COG3278                        | -                              | -                     | -       | -        |
| <i>ccoN</i>                             | HDN1F_27210 | 3,357,106  | 498         | Cytochrome- <i>cbb</i> <sub>3</sub> oxidase, subunit I                 | IPR004677                                   | <i>ccoN</i>                    | Azose                 | 1e-145  | Q5P0X6   |
| <i>ccoO</i>                             | HDN1F_27220 | 3,358,613  | 216         | Cytochrome- <i>cbb</i> <sub>3</sub> oxidase, subunit I                 | IPR003468<br>COG2993                        | <i>ccoO</i>                    | Azose                 | 3e-54   | Q5P0X5   |
| <i>ccoQ</i>                             | HDN1F_27230 | 3,359,260  | 63          | Cytochrome <i>c</i> oxidase subunit                                    | IPR008621                                   | -                              | -                     | -       | -        |
| <i>ccoP</i>                             | HDN1F_27240 | 3,359,444  | 307         | Cytochrome- <i>cbb</i> <sub>3</sub> oxidase, subunit III               | IPR004678<br>COG2010                        | <i>ccoP</i>                    | Azose                 | 2e-48   | Q5P0X3   |

<sup>a</sup> IPR003468: family, cytochrome *c* oxidase, mono-heme subunit; IPR004677: family, cytochrome *c* oxidase *cbb*<sub>3</sub>-type, subunit I; IPR004678: family, cytochrome *c* oxidase *cbb*<sub>3</sub>-type, subunit III; IPR008621: family, *cbb*<sub>3</sub>-type cytochrome oxidase, cytochrome *c* subunit.

<sup>b</sup> COG, cluster of orthologous groups.

<sup>c</sup> COG2010: CccA, cytochrome *c*, mono- and diheme variants; COG2993: CcoO, *cbb*<sub>3</sub>-type cytochrome oxidase, cytochrome *c* subunit; COG3278: CcoN, *cbb*<sub>3</sub>-type cytochrome oxidase, subunit I; COG4736: *cbb*<sub>3</sub>-type cytochrome oxidase, subunit 3.

<sup>d</sup> Abbreviation for organism: Azose, *Azoarcus*-related denitrifying Betaproteobacterium strain EbN1.
